# Supplementary material for: Cryo-EM structure of the Rhodospirillum rubrum RC–LH1 complex at 2.5 Å
Source: PubMed Central journal article supplement (PMC8454704; doi:10.1042/bcj20210511), 2021-09-07
Supplement: BCJ-478-3253-s1.pdf [file BCJ-478-3253-s1.pdf]

## Supplementary material

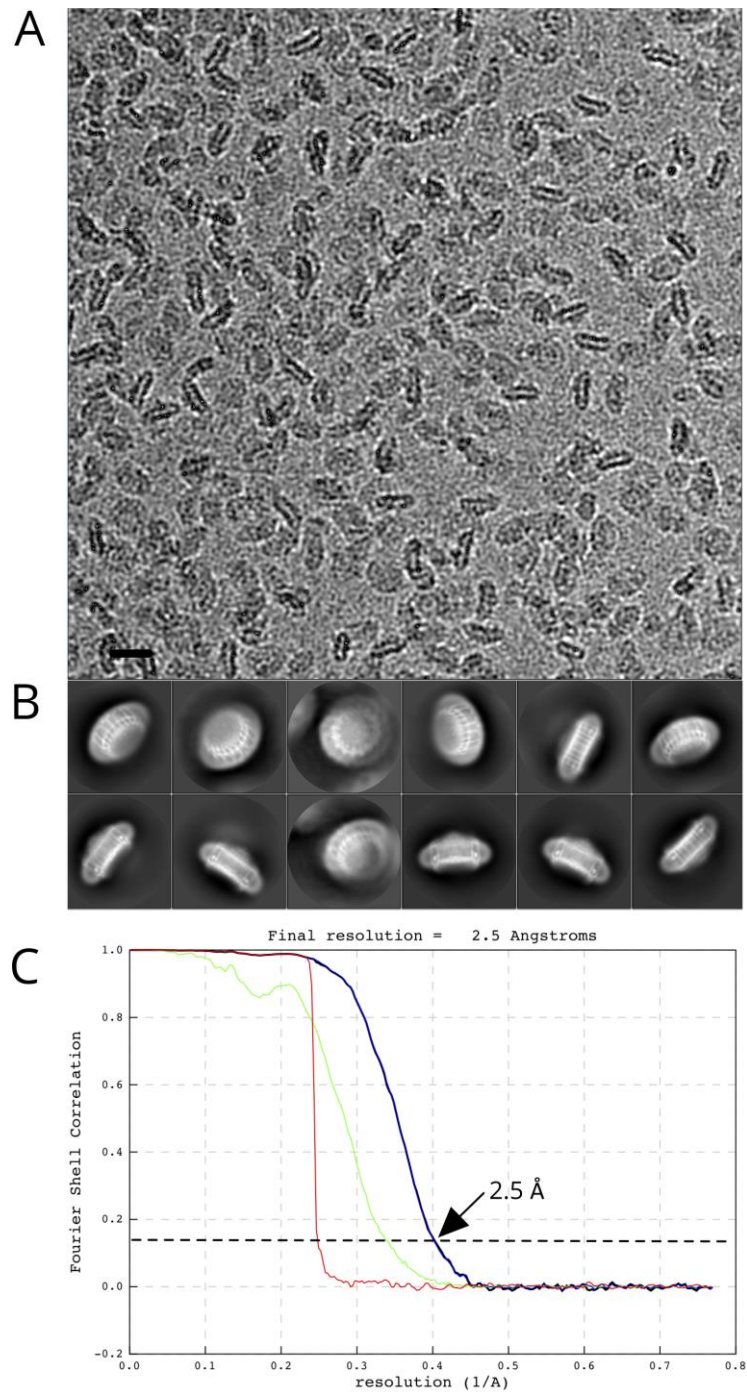

**Figure S1.** Cryo-EM image of the RC-LH1 complex from *Rsp. rubrum* and resolution calculation of 3D map of the complex. (A) A selected cryo-EM micrograph after motion correction. The pixel size of the image is 4k x 4k, corresponding to 266 x 266 nm at the specimen level. A 20 nm scale bar is indicated. (B) Selected 2D classes, box size 25 nm, showing different views of the complex. (C) Fourier shell correlations (red, corrected, phase randomized; green, unmasked; blue, masked). The dashed line shows 0.143 FSC, with an arrow pointing to the global resolution of the map at 2.5 Å.

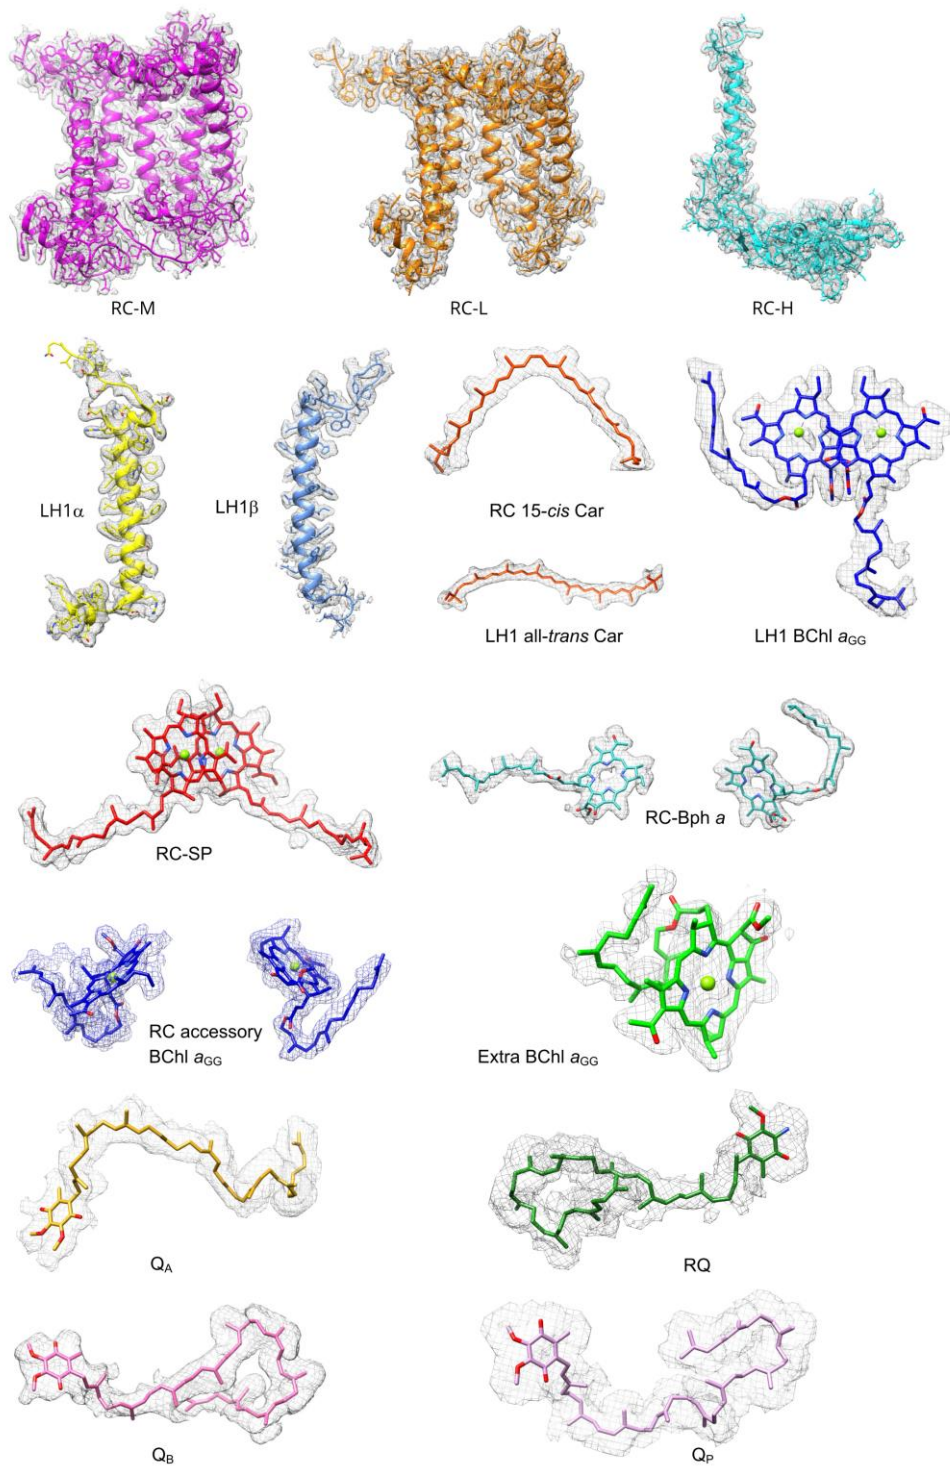

**Figure S2.** Cryo-EM densities and structural models of polypeptides and pigments in the *Rsp. rubrum* RC-LH1 complex. Atomic models of components of the complexes are fitted into their respective density maps, taken from the final refined model. Color codes are the same as in Figure 1.

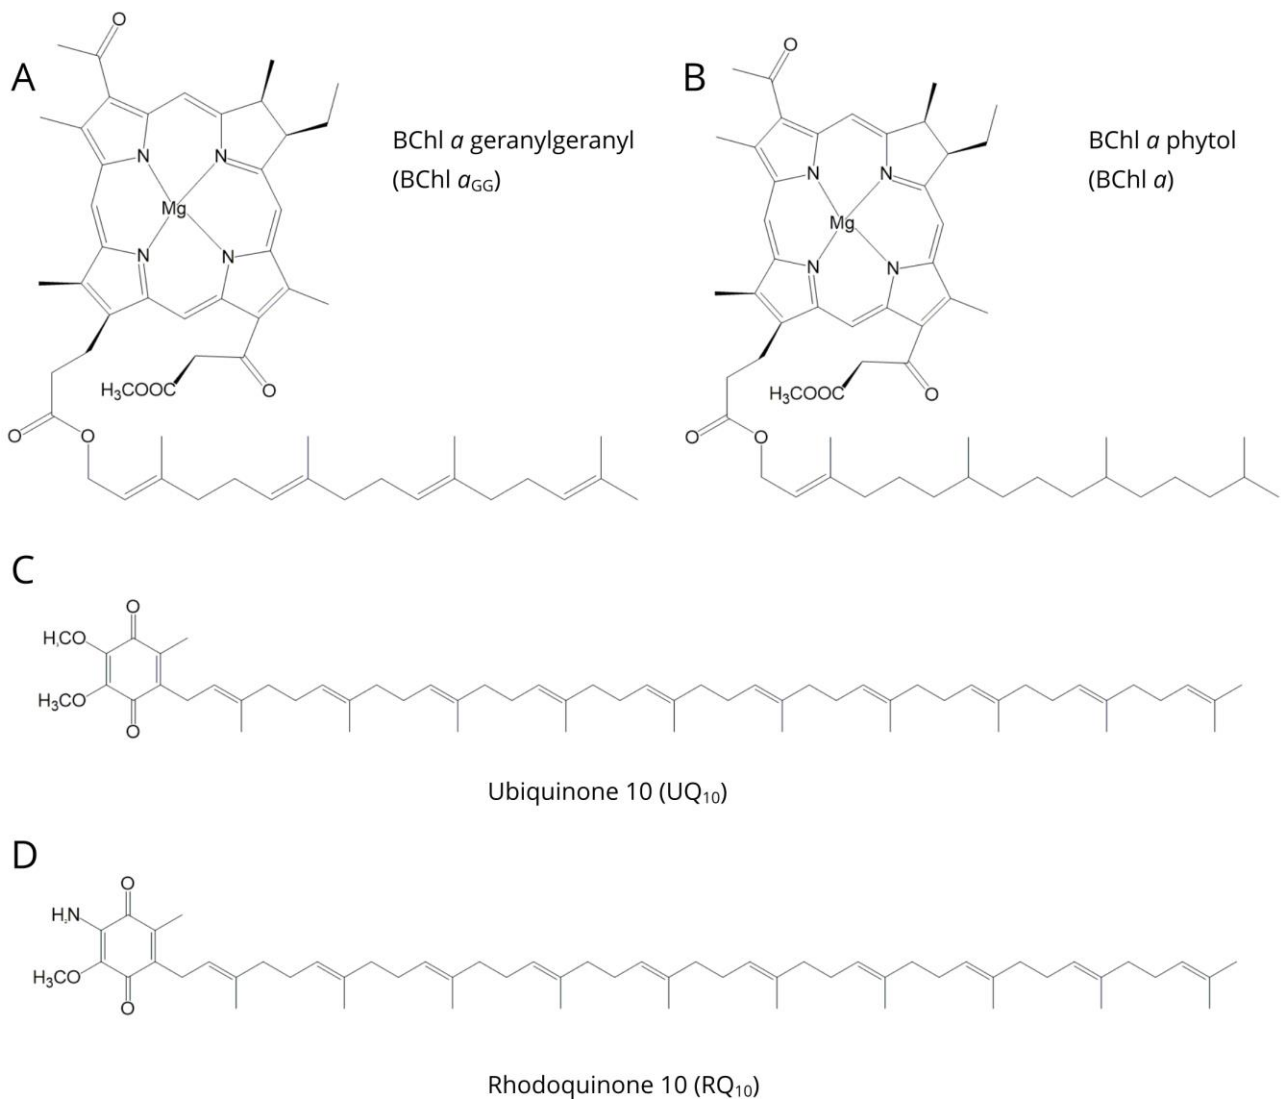

**Figure S3.** Chemical structures of different bacteriochlorophyll *a* and quinone molecules in the RC-LH1 complex of *Rsp. rubrum*. (A) Bacteriochlorophyll *a* esterified with a geranylgeraniol tail. (B) Bacteriochlorophyll *a* esterified with a phytol tail. (C) Ubiquinone-10. (D) Rhodoquinone-10.

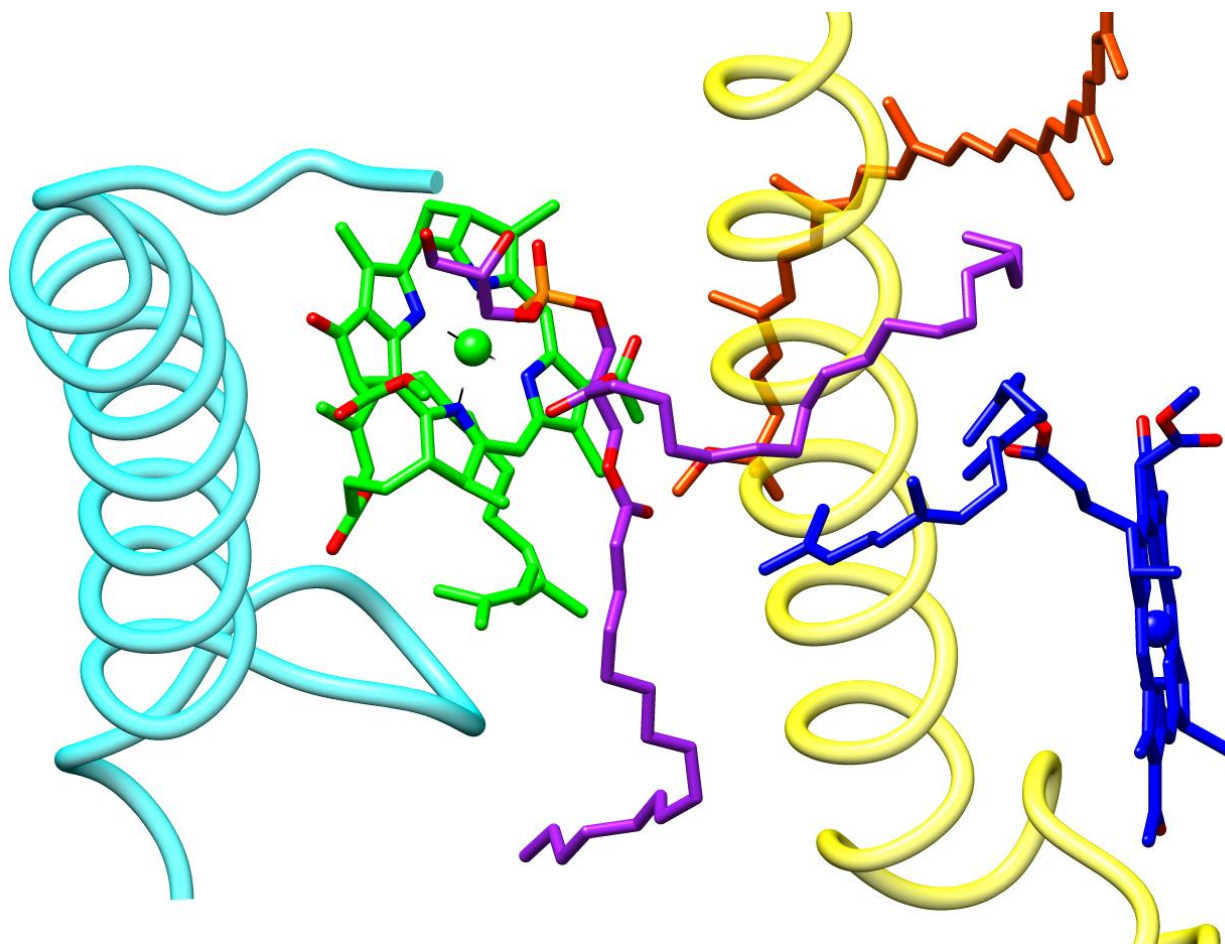

**Figure S4.** Positioning of the phosphatidyl glycerol molecule in relation to the extra BChl  $a_{GG}$ , the nearest carotenoid and the GG tail of an LH1 BChl. Colours: phosphatidyl glycerol (magenta), the extra BChl  $a_{GG}$  (green), LH1 BChl  $a_{GG}$  (blue) LH1  $\alpha$  (yellow), RC-H subunit (cyan).



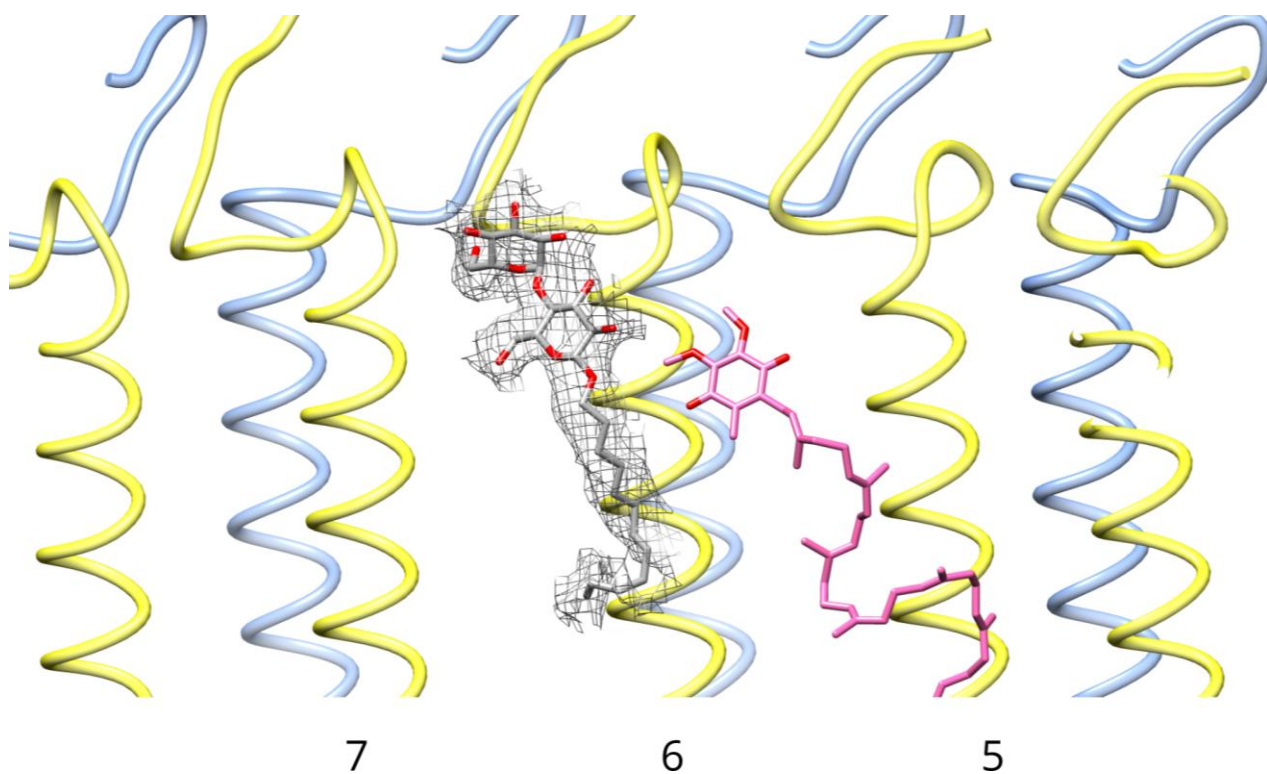

**Figure S5.** Density for the structurally resolved  $\beta$ -DDM detergent molecule (grey), near to  $Q_p$  (pink). These molecules are viewed from the inside of the LH1, looking out. The  $\beta$ -DDM detergent molecule lies between LH1 subunits 6 and 7, and  $Q_p$  is between subunits 5 and 6. Colours:  $\beta$ -DDM detergent (grey),  $Q_p$  (pink), LH1 $\alpha$  (yellow), LH1 $\beta$  (blue).

**Table S1: Cryo-EM data acquisition, model refinement and validation statistics.**

|                                                                   |                              |
|-------------------------------------------------------------------|------------------------------|
| <b>Protein source</b>                                             | Photosynthetic bacterium     |
| <b>Data collection and processing</b>                             |                              |
| Microscope                                                        | ThermoFisher Titan Krios G3i |
| Voltage (kV)                                                      | 300                          |
| Camera                                                            | Falcon 4                     |
| Energy filter                                                     | No                           |
| Energy filter slit width                                          | N/A                          |
| Magnification                                                     | 120,000                      |
| Defocus range ( $\mu\text{m}$ )                                   | -0.8 to -2.2                 |
| Mean defocus ( $\mu\text{m}$ )                                    | -1.8                         |
| Pixel size ( $\text{\AA}$ )                                       | 0.65                         |
| Electron flux ( $e^-/\text{\AA}^2/\text{s}$ )                     | 3.71                         |
| Electron fluence ( $e^-/\text{\AA}^2$ )                           | 44.94                        |
| Exposure time (sec/frame)                                         | 0.29                         |
| Electron fluence per frame ( $e^-/\text{\AA}^2/\text{frame}$ )    | 1.07                         |
| Number of frames per movie                                        | 42                           |
| Number of movies used                                             | 9024                         |
| Initial no. particle images                                       | 1,519,688                    |
| Final no. particle images                                         | 519,005                      |
| Estimated accuracy of translations ( $\text{\AA}$ ) (RELION)      | 0.32                         |
| Estimated accuracy of rotations ( $^\circ$ ) (RELION)             | 0.98                         |
| Symmetry imposed                                                  | C1                           |
| Local resolution range                                            | 2.2 to 2.8                   |
| Resolution of unmasked reconstruction ( $\text{\AA}$ , FSC=0.143) | 2.85                         |
| Resolution of masked reconstruction ( $\text{\AA}$ , FSC=0.143)   | 2.5                          |
| Specimen temperature                                              | ~80K                         |
| Particle box size                                                 | (512 px) <sup>2</sup>        |
| <b>Refinement and validation</b>                                  |                              |
| Refinement package                                                | COOT, ISOLDE, PHENIX         |
| Initial model                                                     | PDB 1LGH, PDB 3I4D           |
| Model resolution ( $\text{\AA}$ , FSC=0.5)                        | 2.5                          |
| Map sharpening B factor ( $\text{\AA}^2$ )                        | -72.38                       |
| <b>Model composition</b>                                          |                              |
| Non-hydrogen atoms                                                | 22902                        |
| Protein residues                                                  | 2293                         |
| Molecular weight (kD)                                             | 297.7                        |
| Protein B factor ( $\text{\AA}^2$ )                               | 27.74                        |
| <b>RMS deviations</b>                                             |                              |
| Bond length ( $\text{\AA}$ )                                      | 0.003                        |
| Bond angle ( $^\circ$ )                                           | 0.752                        |
| <b>Validation</b>                                                 |                              |
| MolProbity score                                                  | 0.79                         |
| Clashscore                                                        | 0.65                         |
| Rotamer outliers (%)                                              | 0.21                         |
| EMRinger score                                                    | 6.29                         |
| Cb deviations (%)                                                 | 0.00                         |
| CaBLAM outliers (%)                                               | 0.4                          |
| <b>Ramachandran plot</b>                                          |                              |
| Favoured (%)                                                      | 97.64                        |
| Allowed (%)                                                       | 2.36                         |
| Disallowed (%)                                                    | 0.00                         |
| Ramachandran Z-score                                              | 0.49                         |
| <b>PDB ID</b>                                                     | 7OY8                         |
| <b>EMDB ID</b>                                                    | EMD-13110                    |
